# Supplementary material for: Palladium catalyzed cross-coupling reaction of 5-tributylstannyl-4-fluoropyrazole
Source: Royal Society of Chemistry journal article supplement (doi:10.1039/b419329f), 2005-01-01
Supplement: b419329f.pdf [file b419329f.pdf]

### Supplementary information

<sup>1</sup>H-NMR & <sup>19</sup>F-NMR data for compounds **4**, **6b-6g**, **7**.

**4** :  $\delta_{\text{H}}(\text{CDCl}_3)$  7.44 (2H, d,  $J$  4.4), 10.45 (1H, s);  $\delta_{\text{F}}(\text{CDCl}_3)$  -180.80 (1F, d,  $J$  4.4)

**6b** :  $\delta_{\text{H}}(\text{CDCl}_3)$  2.32 (3H, s), 2.36 (3H, s), 7.05-7.26 (3H, m), 7.45 (1H, d,  $J$  4.6), 10.44 (1H, s);

$\delta_{\text{F}}(\text{CDCl}_3)$  -177.15 (1F, s)

**6c** :  $\delta_{\text{H}}(\text{CDCl}_3)$  7.31-7.59 (5H, m), 11.09 (1H, s);  $\delta_{\text{F}}(\text{CDCl}_3)$  -175.27 (1F, s)

**6d** :  $\delta_{\text{H}}(\text{CDCl}_3)$  3.81 (3H, s), 7.41-7.63 (4H, m), 7.87 (1H, d,  $J$  7.7), 10.26 (1H, s);  $\delta_{\text{F}}(\text{CDCl}_3)$

-177.52 (1F, d,  $J$  5.8)

**6e** :  $\delta_{\text{H}}(\text{CDCl}_3)$  3.85 (3H, s), 6.89-6.94 (1H, m), 7.32-7.39 (3H, m), 7.50 (1H, d,  $J$  4.6), 10.33

(1H, s);  $\delta_{\text{F}}(\text{CDCl}_3)$  -177.24 (1F, d,  $J$  4.6)

**6f** :  $\delta_{\text{H}}(\text{CDCl}_3)$  3.84 (3H, s), 6.93 (2H, d,  $J$  8.3), 7.45 (1H, d, 4.4), 7.66 (2H, d,  $J$  8.3), 11.25

(1H, s);  $\delta_{\text{F}}(\text{CDCl}_3)$  -179.58 (1F, d,  $J$  4.4)

**6g** :  $\delta_{\text{H}}(\text{CDCl}_3)$  7.57 (1H, d,  $J$  4.6), 8.04 (2H, dt,  $J$  9.0, 2.2), 8.30 (2H, dt,  $J$  9.0, 2.2), 10.03 (1H,

s);  $\delta_{\text{F}}(\text{CDCl}_3)$  -175.41 (1F, d,  $J$  4.6)

**7** :  $\delta_{\text{H}}(\text{CDCl}_3)$  7.45 (1H, d,  $J$  5.1), 12.27 (1H, s);  $\delta_{\text{F}}(\text{CDCl}_3)$  -171.90 (1F, brs)
